# Supplementary material for: The use of Faecal Microbiota Transplantation (FMT) in Europe: A Europe-wide survey
Source: PubMed Central journal article supplement — Lancet Reg Health Eur. 2021 Jul 19;9:100181. doi: 10.1016/j.lanepe.2021.100181 (PMC8513118; doi:10.1016/j.lanepe.2021.100181), 2021-07-19
Supplement: mmc1.pdf [file mmc1.pdf]

## European FMT cost survey

Dear ,

Thank you for your agreement to participate in this survey about the activities and costs related to FMT. The survey is endorsed by the United European Gastroenterology (UEG) working group for FMT. A joint decision to conduct this survey was made by all attending working group members attending the UEG working group meeting in Barcelona at the 20th October 2019. The results of the survey will be presented at the next UEG working group meeting and published in a scientific journal, publicly available.

The survey consists of 7 sections with questions related to FMT. Each section covers specific parts of the value chain needed to provide FMT routinely. An additional section covers the country-specific regulation.

Please answer the questions to the best of your knowledge, and please provide all costs in your local currency.

If you have any questions related to the survey, please do not hesitate to contact me.

On behalf of the UEG stool bank working group

Kind regards,

Christian L Hvas, MD PhD

Christian.hvas@auh.rm.dk

---

**Demographic information**


---

Country

- Austria
- Belgium
- Bulgaria
- Czech Republic
- Denmark
- Finland
- France
- Germany
- Hungary
- Iceland
- Ireland
- Italy
- Lithuania
- Netherlands
- Norway
- Poland
- Russia
- Spain
- Sweden
- Switzerland
- Turkey
- United Kingdom
- Other (specify)

---

Country (other), please specify

---



---

Institution

---

---

Responsible person, name

---

---

Responsible person, medical specialty

- Gastroenterology
  - Infectious diseases
  - Clinical Microbiology
  - Clinical Immunology
  - Other
- 

Other speciality, please specify

---

---

Would you like to participate in the survey?

- No (survey ends)
  - Yes, with name and institution in Acknowledgements
  - Yes, anonymously
- 

General comments

# European FMT cost survey

## Activity, modalities, and indications for FMT in 2019

Based on your activity in 2019, what is the

Total number of FMT procedures in 2019 in your centre

\_\_\_\_\_

Number of FMT procedures for Clostridioides (formerly Clostridium) difficile-associated disease in 2019, in your centre

\_\_\_\_\_

Number of FMT procedures for non-CDI-related conditions in 2019, in your centre

\_\_\_\_\_

Do you distribute FMT components to other centres or facilities?

Yes  No

If yes, how many components/treatments were distributed to other centres in 2019?

\_\_\_\_\_

Which administration modalities did you use for FMT?

(Please tick one or more as appropriate)

- Enema
- Colonoscopy
- Gastroscopy
- Nasogastric tube
- Nasoduodenal/nasojejunal tube
- Capsules (glycerol-based)
- Capsules (lyophilised)
- Other

Other modality, please specify

\_\_\_\_\_

Which is your most frequently used method of application?

(Please tick one)

- Enema
- Colonoscopy
- Gastroscopy
- Nasogastric tube
- Nasoduodenal/nasojejunal tube
- Capsules (glycerol-based)
- Capsules (lyophilised)
- Other

Other standard modality, please specify

\_\_\_\_\_

Is FMT used for routine and/or research purposes?

(Please tick one or more as appropriate)

- Routine clinical care outside of research protocols
- Randomised clinical trial
- Other protocol-based treatment

---

 Routine indications for FMT

(Please tick one or more as appropriate)

- Recurrent Clostridioides difficile
  - Refractory Clostridioides difficile\*
  - Critically ill with Clostridioides difficile
  - Index/first Clostridioides difficile
  - Ulcerative colitis
  - Crohn's disease
  - Irritable bowel syndrome
  - Pouchitis
  - Multidrug resistance
  - Antibiotics-associated diarrhea without Clostridioides difficile
  - Graft versus host disease
  - Obesity
  - Spondylarthropathy
  - Other
- (Refractory Clostridioides difficile defined as no clinical response to standard antibiotics within 6 days after prescription)
- 

Other indications, please specify

\_\_\_\_\_

---

 Experimental (within trials) indications for FMT

(Please tick one or more as appropriate)

- Recurrent Clostridioides difficile
  - Refractory Clostridioides difficile\*
  - Critically ill with Clostridioides difficile
  - Index/first Clostridioides difficile
  - Ulcerative colitis
  - Crohn's disease
  - Irritable bowel syndrome
  - Pouchitis
  - Multidrug resistance
  - Antibiotics-associated diarrhea without Clostridioides difficile
  - Graft versus host disease
  - Obesity
  - Spondylarthropathy
  - Other
- (Refractory Clostridioides difficile defined as no clinical response to standard antibiotics within 6 days after prescription)
- 

Other indications, please specify

\_\_\_\_\_

---

 Do you have defined contraindications against FMT for Clostridioides difficile infection?

 Yes    No

---

 Please specify the contraindications against FMT for Clostridioides difficile infection

\_\_\_\_\_

---

 Comments to this section

\_\_\_\_\_

## Donor recruitment and donor screening

By which method do you recruit faeces donors?

(Please tick one or more as appropriate)

- No active recruitment is performed
- Public advertising
- Restricted advertising, i.e. among students, societies
- Recruitment through personal contact in e.g. Blood centre
- Recruitment from other specific setting (specify)

Other recruitment method, please specify

\_\_\_\_\_

Do you perform an initial, questionnaire-based pre-screening on all potential donors?

- Yes  No

Do you allow/practice dedicated donation, i.e. donation from a donor known to the patient?

(Please tick one)

- Only dedicated (known to the patient) donors is used
- Both dedicated and anonymous donors
- Only anonymous donors

Do you allow health care professionals as faeces donors in your institution?

- Yes  No

Is your donor selection based on the absence of risk factors (clinical, biochemical, faecal) alone or do you also make a positive selection for e.g. microbiota patterns?

(Please tick one)

- Only absence of risk factors
- Absence of risk factors and positive selection (specify)

Donor selection method, please specify

\_\_\_\_\_

Comments to this section

## Organisation of donation and laboratory processing

In which setting does donation and processing take place at your institution?

(Please tick one)

- Clinical microbiology  
 Clinical immunology including blood centre  
 Research laboratory  
 Other

Other setting, please specify

\_\_\_\_\_

Which staff is directly involved in the laboratory processing of donor faeces?

(Please tick one or more as appropriate)

- Laboratory technicians  
 Nurses  
 Physicians  
 Research assistants  
 Other (specify)

Other staff, please specify

\_\_\_\_\_

What is the maximum time from defaecation to initiation of the laboratory processing?

(Please specify in hours)

\_\_\_\_\_

Do you perform a post-donation screening (blood and faeces tests)?

- Yes  No

Is quarantine of FMT components until fulfillment of release criteria practiced?

- Yes  No

Are routine quality controls performed?

- Yes  No

Please describe your quality control measures

\_\_\_\_\_

Based on your institutions experience with handling donors for FMT, what is the:

Average faeces wet weight per donation

(In grams of faeces)

\_\_\_\_\_

Average number of faecal donations per round of donations before completing the post-donation screening

\_\_\_\_\_

Did you define a maximum length for the donation period, i.e. from the first to last faeces donation?

- Yes  No

Maximum duration of donation period (In number of days from first to last faeces donation), if specified?

\_\_\_\_\_

Do donors receive reimbursement following faeces donation?

(Please tick one or more as appropriate)

- No, reimbursement  
 Yes, transportation  
 Yes, fixed reimbursement per donation for all donors (specify)  
 Yes, fixed reimbursement per donation for donors in clinical trials (specify)  
 Yes, other reimbursement (specify)

Type and amount of reimbursement, please specify

Based on your laboratory protocol for FMT components, what is the:

Amount of donor faeces used for one FMT component

(In grams of faeces)

Do you use fresh and/or frozen donor faeces?

(Please tick one)

- Only fresh  
 Only frozen  
 Both fresh and frozen

At what temperature are FMT components kept?

(Please tick one or more as appropriate)

- No cryopreservation practiced  
 Minus 20°C  
 Minus 80°C  
 Other (specify)

For how long is storage at -20°C allowed at your institution

(Please specify in months)

For how long is storage at -80°C allowed at your institution

(Please specify in months)

Other temperature, please specify

Do you have a specific protocol for donation and FMT components for immunocompromised patients?

- Yes    No

Protocol for immunocompromised patients, please specify

Comments to this section

## Organisation of clinical application

Do you have specific staff allocated to the clinical application of FMT, and whom?

(Please tick one or more as appropriate)

- No specific staff is allocated  
 Physicians  
 Nurses  
 Laboratory technicians  
 Research assistants  
 Other (specify)

Other staff allocated to the clinical application of FMT, please specify

Do you routinely perform repeated administrations of FMT as a part of the same treatment?

(Please tick one)

- No, always single FMT  
 Yes, occasional repeated FMT without predefined criteria  
 Yes, by predefined criteria (specify)

Please state criteria for repeated FMT (patient type, risk factor, treatment protocol)

Do you document follow-up in all patients who receive FMT?

- Yes    No

How is your clinical follow-up practiced?

(Please tick one or more as appropriate)

- Clinical appointment  
 Telephone call  
 Medical record  
 Other (specify)

Other form of follow-up, please specify

What is the longest scheduled follow-up in patients who had FMT for *Clostridioides difficile* infection?

(Please specify in weeks)

What is the longest scheduled follow-up in patients who had FMT for other indications?

(Please specify in weeks)

Comments to this section



## Regulation, audit, safety

Do you maintain a centralised database of FMT activity in your centre?  Yes  No

Has a formal auditing system been implemented in your centre?  Yes  No

Audit details please describe who carries out the audit, how often, and other elements?

\_\_\_\_\_

Do you have regulation from a national health authority?

(Please tick one or more as appropriate)

- No regulation  
 Yes, dialogue with health authority  
 Yes, formal regulation from tissue authority  
 Yes, formal regulation from medicines authority  
 Yes, Ethics Committee  
 Yes, other regulation (specify)

Nature of other regulation, please specify

\_\_\_\_\_

Is FMT component processing performed and accredited according to GMP?  Yes  No

Are clinical trials conducted with GCP monitoring?

(Please tick one)

- Yes  
 No  
 Not applicable (no trials conducted)

Are adverse events recorded in a predefined manner?  Yes  No

Please describe the recording of adverse events

\_\_\_\_\_

Are adverse events reported to an external party?  Yes  No

Please specify to which external party

\_\_\_\_\_

Comments to this section
